# Supplementary material for: Synthesis and Characterization of Poly(lactic acid) Composites with Organosolv Lignin
Source: MDPI journal article supplement (doi:10.3390/molecules27238143), 2022-11-23
Supplement: s1 [file s1]

# Synthesis and characterization of poly(lactic acid) composites with organosolv lignin

Zoi Terzopoulou<sup>1\*</sup>, Eleftheria Xanthopoulou<sup>1</sup>, Nikolaos Pardalis<sup>1</sup>, Christina P. Pappa<sup>2</sup>, Stylianos Torofias<sup>2</sup>, Konstantinos S. Triantafyllidis<sup>2</sup>, Dimitrios N. Bikiaris<sup>1\*</sup>

<sup>1</sup> Laboratory of Chemistry and Technology of Polymers and Dyes, Department of Chemistry, Aristotle University of Thessaloniki, GR54124 Thessaloniki, Greece, [terzozoi@chem.auth.gr](mailto:terzozoi@chem.auth.gr) (Z.T.); [eleftheria.xanthopoulou@gmail.com](mailto:eleftheria.xanthopoulou@gmail.com) (E.X.); [npardalis@chem.auth.gr](mailto:npardalis@chem.auth.gr) (N.P.); [dbic@chem.auth.gr](mailto:dbic@chem.auth.gr) (D.N.B.)

<sup>2</sup> Laboratory of Chemical and Environmental Technology, Department of Chemistry, Aristotle University of Thessaloniki, GR54124 Thessaloniki, Greece, [christipappa@chem.auth.gr](mailto:christipappa@chem.auth.gr) (X.P.); [torofias@gmail.com](mailto:torofias@gmail.com) (S.T.); [ktrianta@chem.auth.gr](mailto:ktrianta@chem.auth.gr) (K.T.)

\* Correspondence: Z.T. [terzozoi@chem.auth.gr](mailto:terzozoi@chem.auth.gr); Tel.: +302310997818, D.N.B. [dbic@chem.auth.gr](mailto:dbic@chem.auth.gr); Tel.: +302310997812

## I. Methods

Quantitative <sup>31</sup>P-NMR analysis was performed on an Agilent 500 spectrometer (Agilent 171 Technologies, Santa Clara, CA). In more detail, 40 mg of pre-dried lignins were dissolved in 0.5 ml of a deuterated chloroform/anhydrous pyridine solution (1:1.6, v/v) (Solvent A) and 100 µl of a solution of chromium(III) 2,4-pentanedionate (5 mg/mL) (relaxation agent) and N-hydroxy-5-norbornene-2,3-dicarboxylic acid imide (NHND, 18 mg/mL) (internal standard) dissolved in Solvent A. The solution was stirred until the lignins were fully dissolved. Finally, 100 µl of 2-Chloro-4,4,5,5-tetramethyl-1,2,3-dioxaphospholane (TMDP) was added dropwise. For the measurement, 128 scans and a relaxation delay of 10 sec were selected. Prior to the quantification analysis, the sharp peak corresponding to the TMDP+H<sub>2</sub>O was shifted and assigned to 132.2 ppm. NMR data were processed with MestReNova (Version 14.0.2-26256, Mestrelab Research).

## II. Tables

**Table S1.** Quantitative assignments of functional groups and their abundance present in OBS and OBSBM8 lignins, as determined <sup>31</sup>P-NMR analysis

| Lignin functional groups – Abundance (mmol/gr) | OBS         | OBSBM8      | Chemical shifts (δ <sub>p</sub> ) |
|------------------------------------------------|-------------|-------------|-----------------------------------|
| Aliphatic OH                                   | 1.52        | 2.12        | 145-150                           |
| Phenolic OH                                    | 3.45        | 3.08        | 137-144.5                         |
| COOH                                           | 0.08        | 0.07        | 134-136                           |
| <b>Total OH content</b>                        | <b>5.05</b> | <b>5.27</b> | <b>134-150</b>                    |

### III. Figures

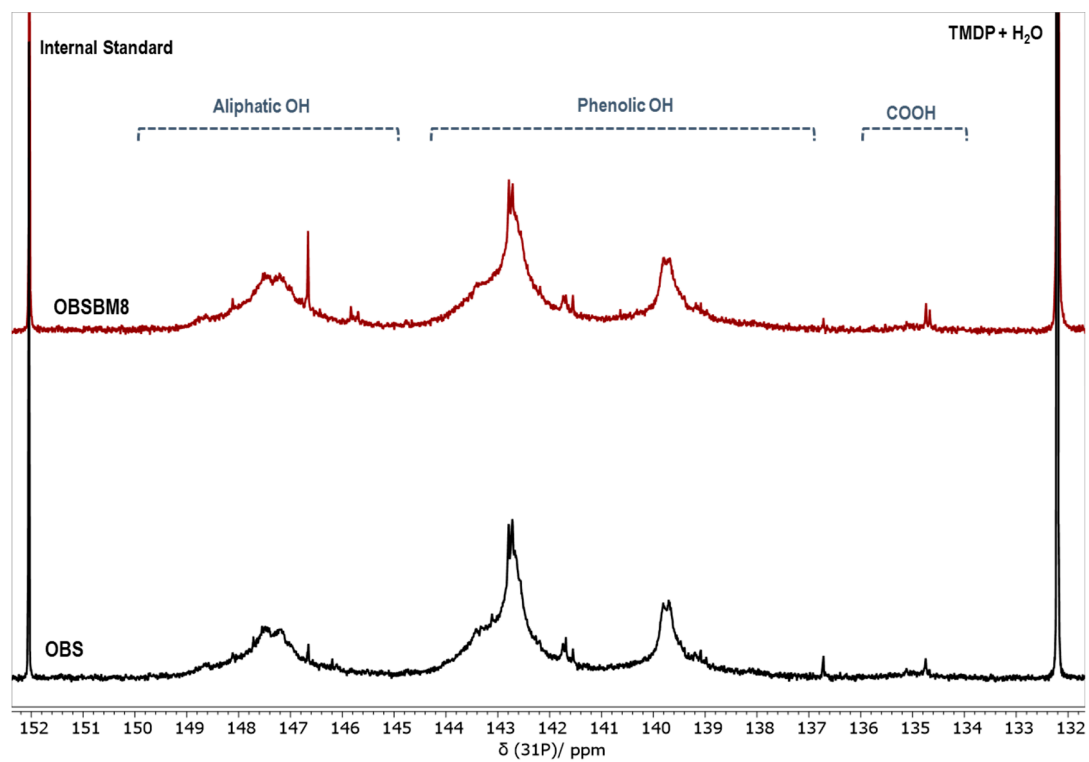

**Figure S1.**  $^{31}\text{P}$ -NMR spectra of OBS and OBSBM8 lignins

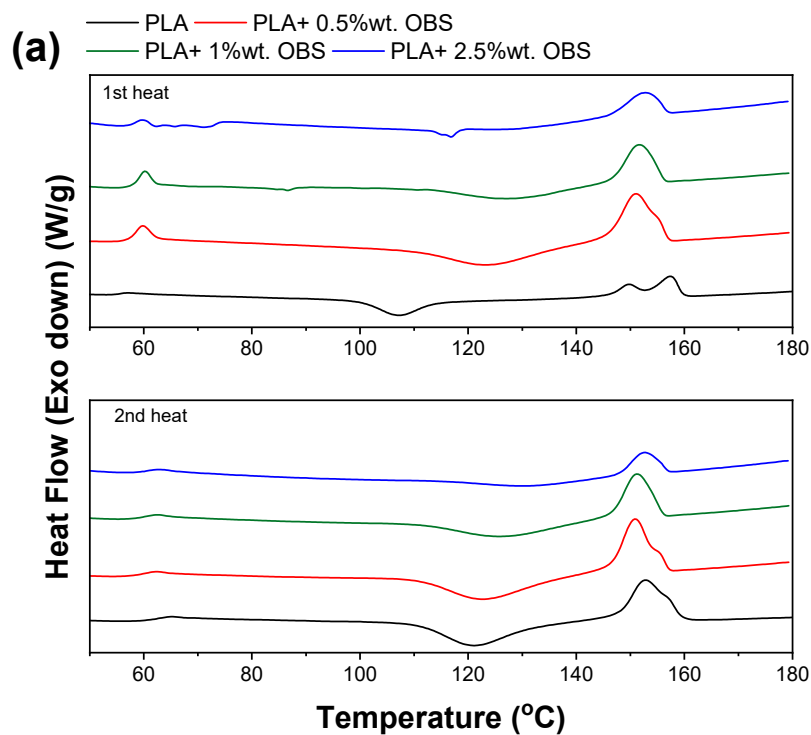

**Figure S2.** DSC scans of PLA/OBS composites.

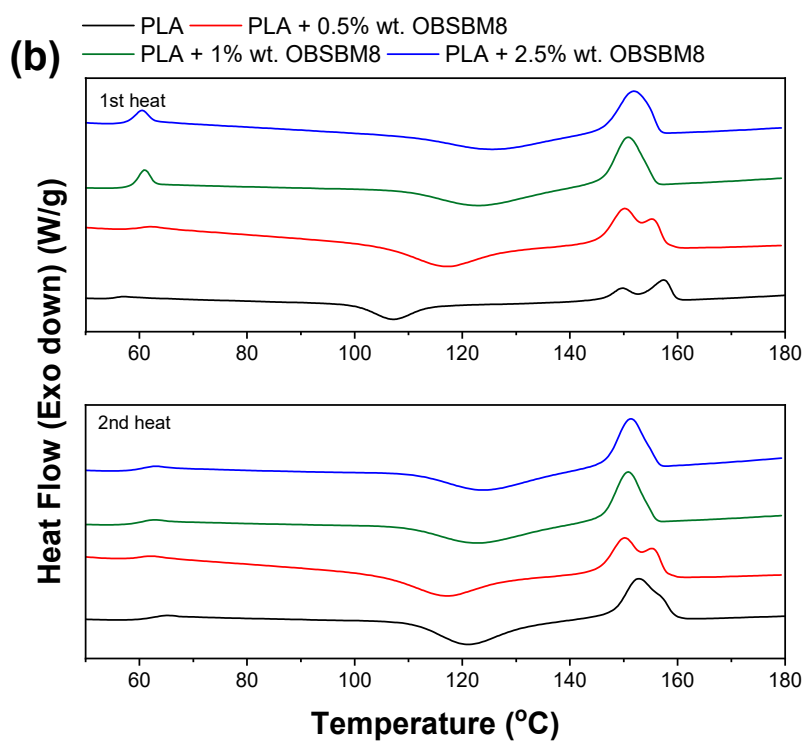

**Figure S3.** DSC scans of PLA/OBSBM8 composites.

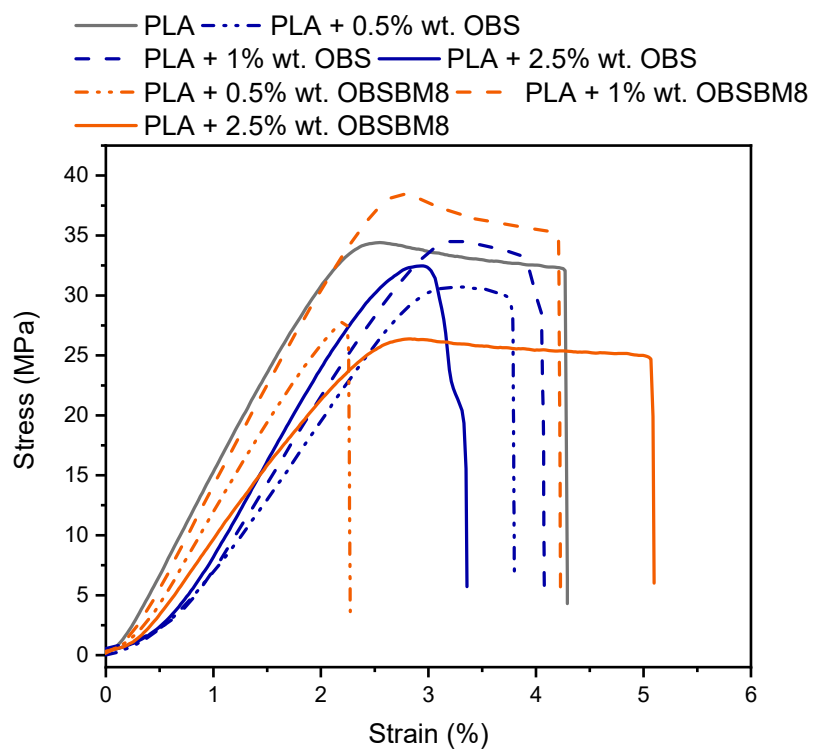

**Figure S4.** Indicative stress-strain curves of PLA and its composites with OBS and OBSBM8 lignin.
